# Supplementary material for: 97 percent light absorption in an ultrabroadband frequency range utilizing an ultrathin metal layer: randomly oriented, densely packed dielectric nanowires as an excellent light trapping scaffold
Source: Royal Society of Chemistry journal article supplement (doi:10.1039/c7nr04186a), 2017-01-01
Supplement: c7nr04186a1.pdf [file c7nr04186a1.pdf]

## Supporting Information

### 97 Percent Light Absorption in an Ultrabroadband Frequency Range Utilizing an Ultrathin Metal Layer: Randomly Oriented, Densely Packed Dielectric Nanowires as an Excellent Light Trapping Scaffold

Amir Ghobadi<sup>1,2,\*</sup>, Sina Abedini Dereshgi<sup>1,2</sup>, Hodjat Hajian<sup>1</sup>, Gizem Birant<sup>7</sup>, Bayram Butun<sup>1</sup>, Alpan Bek<sup>5,6,7</sup>, Ekmel Ozbay<sup>1,2,3,4,\*</sup>

#### Experimental section

**Chemicals:** All the chemicals were used as received without further purification. Titanium (IV) butoxide (Ti(OBu)<sub>4</sub>, 97%, Sigma–Aldrich), hydrochloric acid (HCl, 36%, Sigma–Aldrich) and HPLC-grade water (H<sub>2</sub>O) are used in hydrothermal growth of TiO<sub>2</sub> nanowires on FTO coated glass (7 Ω sq<sup>-1</sup>, Solaronix). Diethylzinc (DEZn, Sigma-Aldrich) and HPLC-grade water (H<sub>2</sub>O) are used as the zinc and oxygen precursors in the ALD process, respectively.

**Hydrothermal Synthesis of TiO<sub>2</sub> Nanowire Arrays:** TiO<sub>2</sub> nanowire arrays were synthesized by a hydrothermal process on FTO glass as described in our previous study. Briefly, FTO glasses are cleaned in sonication baths in ethanol, acetone and de-ionized (DI) water each for 15 min and then dried by N<sub>2</sub> flow. In a typical process, HCl (20 mL) and DI water (20 mL) are stirred for 10 min in a teflon-lined stainless steel autoclave with a capacity of 45 mL. Then, 0.8 mL Ti(OBu)<sub>4</sub> is added in the solution and stirring continues for an additional 30 min under ambient conditions. FTO is placed into the autoclave with the conducting side facing up with a 45° angle. After the autoclave is maintained at 140 °C for 5 hours, it is allowed to cool to room temperature. The final products are rinsed extensively with DI water to remove residues of solvents and dried in air.

**ALD Deposition Pt Shell Layer on TiO<sub>2</sub> Nanowire Arrays:** Pt layer deposition is carried out at 200 °C in an ALD reactor (Cambridge Nanotech Savannah S100). MeCpPtMe<sub>3</sub> was used as the Pt atom precursor and ozone is employed as the oxygen agent. These precursors are consecutively pulsed and purged into the chamber. The pulse and purge times for Pt are 0.1 s and 10 s, respectively. The deposition of the shell layer was carried out using multiple successive cycles with an estimated growth of 0.8 Å per cycle to obtain a thickness of 10 nm.

**Structural Characterization:** Scanning electron microscope (SEM, FEI – Quanta 200 FEG) operated at 10 kV and transmission electron microscope (TEM, Tecnai G2-F30, FEI) operated at 200 kV. TEM samples were dispersed in ethanol and prepared on a holey carbon coated copper grid. Selected area electron diffraction (SAED) analysis is also characterized to identify the growth direction and crystallinity of the nanowires.

**Optical Characterization:** The normal reflection measurements for the wavelength range of 300 nm to 1000 nm were carried out employing an integrated sphere setup. The angle-resolved reflection characterization was carried out using J.A. Woollam Co. Inc. VASE Ellipsometer for two different polarizations of TM and TE.

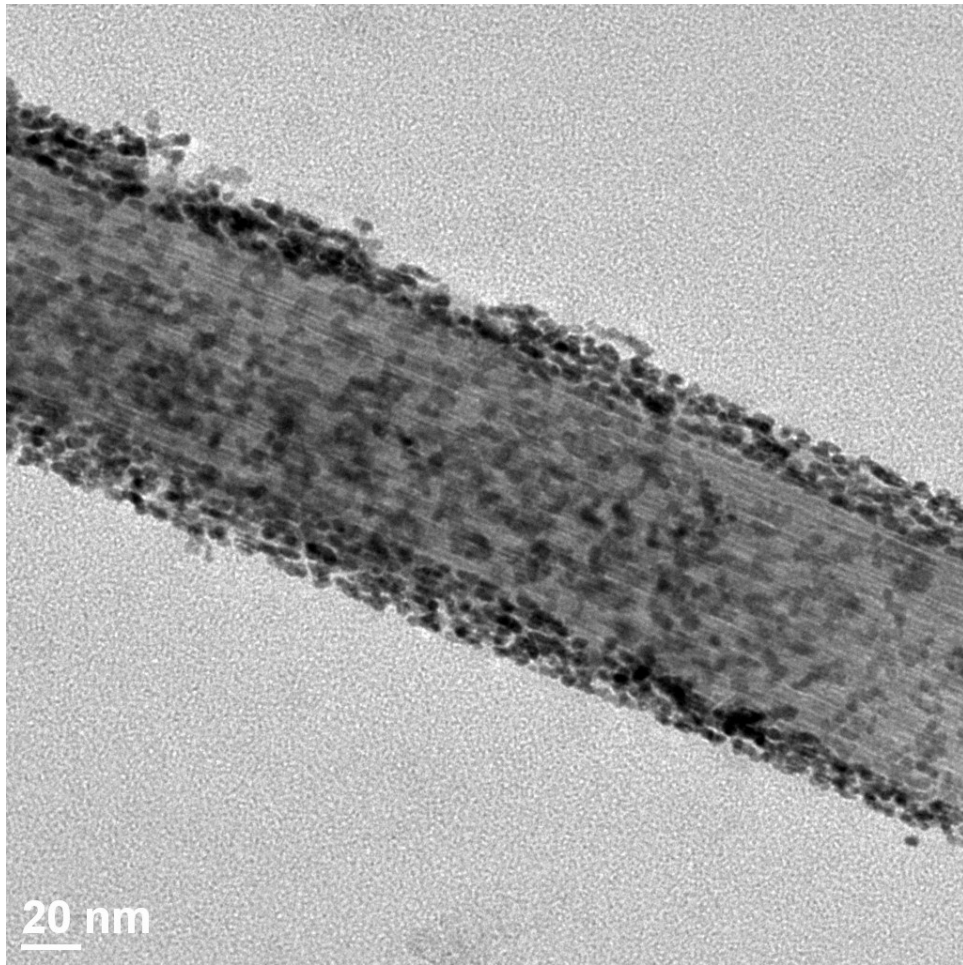

Fig. S1. TEM image of the Pt coated  $\text{TiO}_2$  nanowires in the first ALD cycles where a continuous film has not been made.
